# Supplementary material for: Limited vaccine-induced CD8+ T cell immunity in HIV-infected immunological nonresponders
Source: JCI journal article supplement (doi:10.1172/jci.insight.195458), 2025-11-09
Supplement: sd1 [file 1]

# Supplemental Figure 1

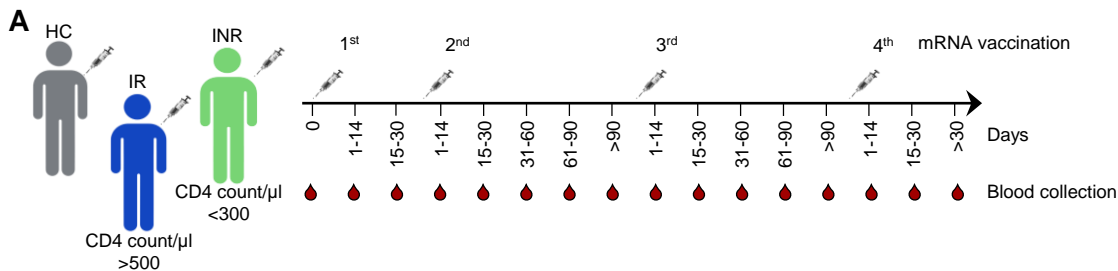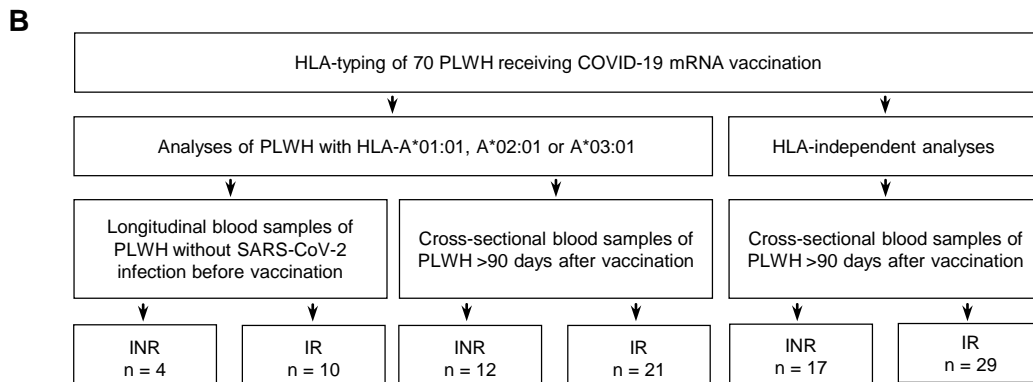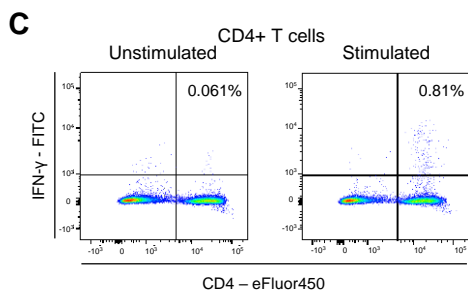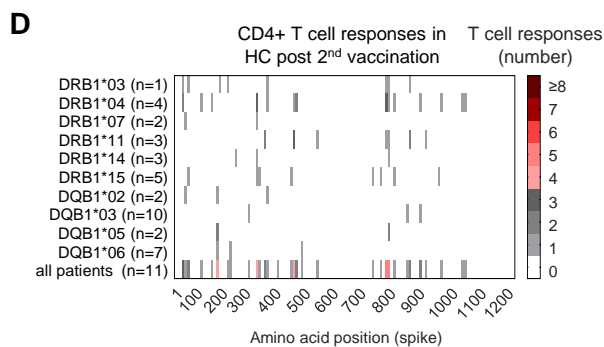

**E**

Number of spike-specific CD4+ T cell responses

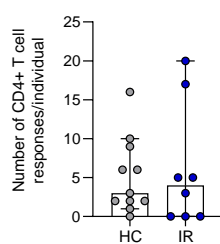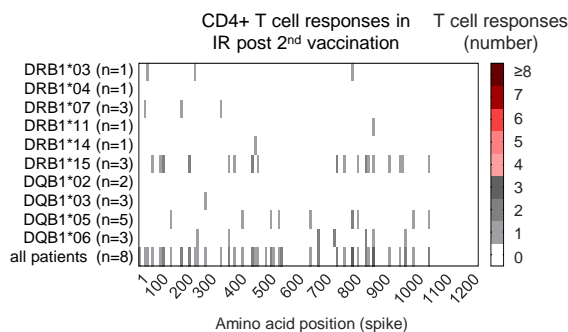

**Supplemental Figure 1. Study design and spike-specific CD4+ T cell responses in IR and HC. (A)** Overview of cohort including vaccination and blood sampling schedule. **(B)** Flow chart displaying the study design and number of individuals included in the analyses. **(C)** Representative dot plots of unstimulated and peptide-stimulated CD4+ T cells. **(D)** Spike-specific CD4+ T cell responses to overlapping peptides (OLPs) of the spike protein detected in HC (n=11) and IR (n=8) >20 days post 2<sup>nd</sup> vaccination. Number of tested individuals (per HLA allotype and in total) and location of these epitopes within the spike protein are indicated. Data from same HC as in main figure 1A are displayed. **(E)** Number of CD4+ T cell responses per individual induced by stimulation with OLPs. Data from same HC as in main figure 1B are displayed. Median values are depicted with 95% confidence interval error bars. Statistical analysis was performed by a two-tailed Mann–Whitney U test (E).

# Supplemental Figure 2

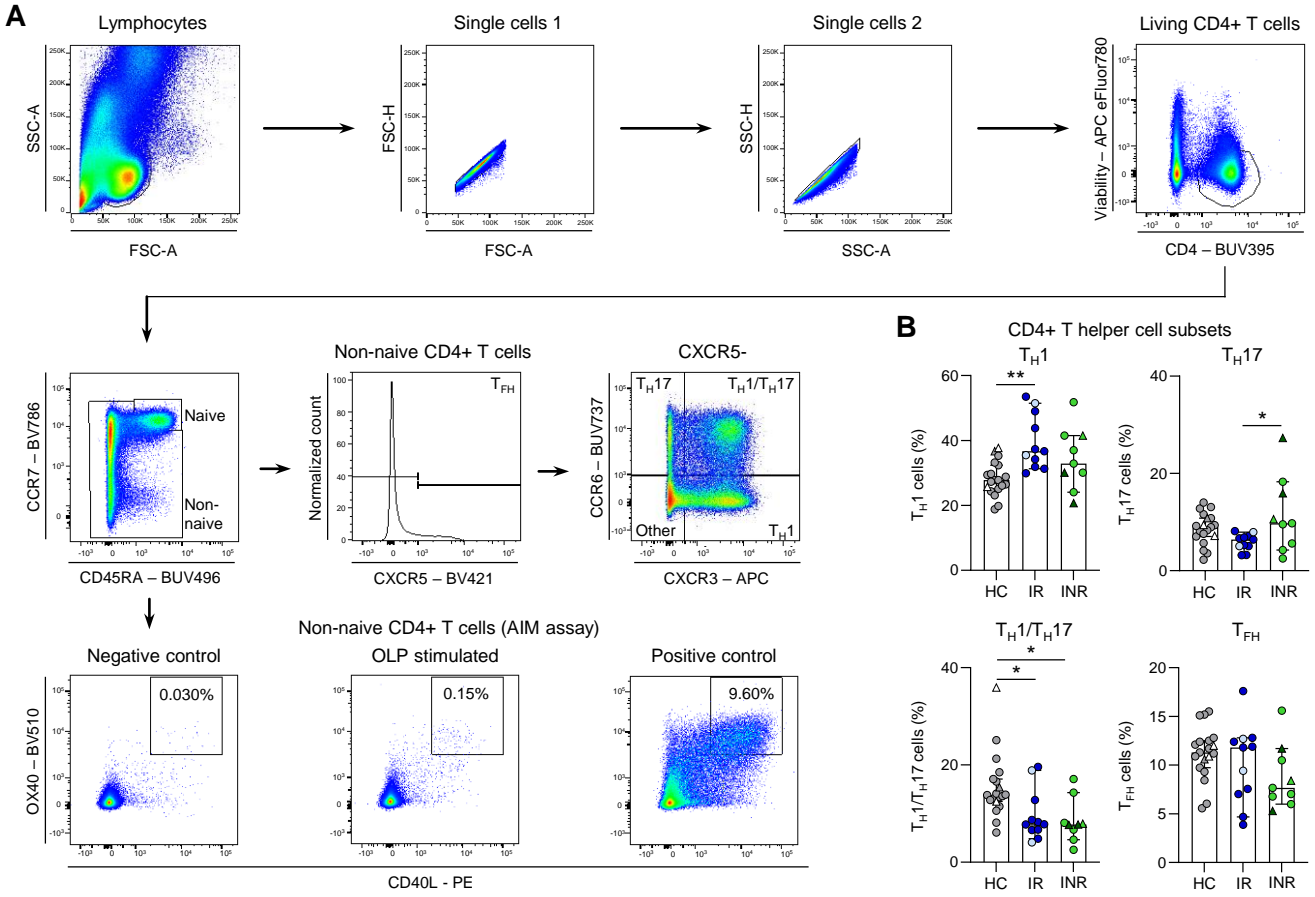

**Supplemental Figure 2. Altered CD4+ T cell compartment in INR and IR compared to HC. (A)** Gating strategy to define activation-induced marker (AIM)+ non-naive CD4+ T cells and CD4+ T helper (T<sub>H</sub>) cell subsets. AIM+ CD4+ T cells were detected by the expression of OX40 and CD40L. **(B)** Non-naive CD4+ T helper (T<sub>H</sub>) cell subsets are shown in DMSO-treated samples of HC (n=19), IR (n=11) and INR (n=9). T<sub>FH</sub>: CXCR5+; T<sub>H1</sub>: CXCR3+CCR6-; T<sub>H1</sub>/T<sub>H17</sub>: CXCR3+CCR6+; T<sub>H17</sub>: CXCR3-CCR6+; Other: CXCR3-CCR6-. Grey, blue and green indicate time points post 2<sup>nd</sup> vaccination. White, light blue and dark green indicate time points post 3<sup>rd</sup> vaccination. Median values are depicted with 95% confidence interval error bars. Statistical analysis was performed by a Kruskal-Wallis test and Dunn's multiple comparison test (B). Circles indicate vaccine-induced CD4+ T cell responses. Triangles indicate hybrid immunity.

## Supplemental Figure 3

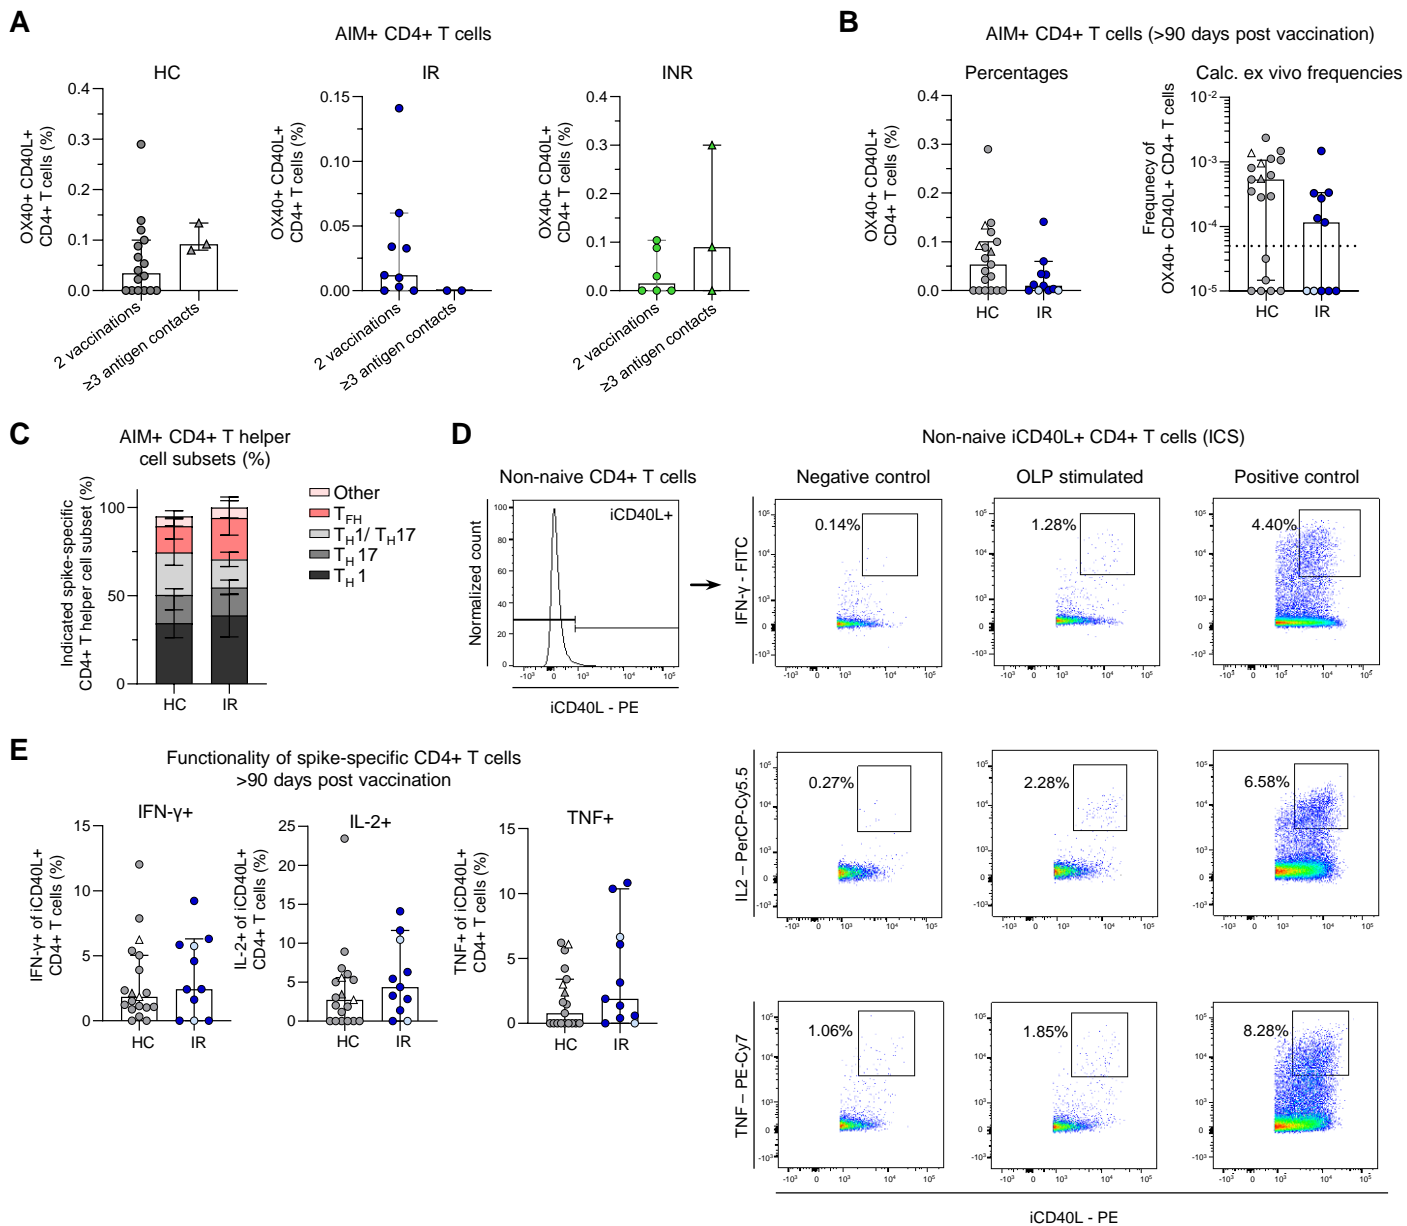

**Supplemental Figure 3. Similar virus-specific CD4+ T cell responses in IR and HC.** (A) Percentages of AIM+ (OX40+ CD40L+) non-naïve CD4+ T cells in HC, IR and INR post 2<sup>nd</sup> vaccination (HC n=17; IR n=9; INR n=7) and after ≥3 antigen contacts (HC n=2; IR n=2; INR n=2). Values are shown after subtracting the signal detected in paired unstimulated samples. (B) Percentages and calculated ex vivo frequencies of AIM+ non-naïve CD4+ T cells in HC (n=19) and IR (n=11) >90 days post 2<sup>nd</sup> (grey; blue) or 3<sup>rd</sup> (white; light blue) mRNA vaccination. Values are shown after subtracting the signal detected in paired unstimulated samples. Data from same HC as in main figure 1C are displayed. (C) Percentages of non-naïve AIM+ CD4+ T helper cell subsets are shown in HC (n=12) and IR (n=2). Data from same HC as in main figure 1D are displayed. (D) Gating strategy to detect intracellular cytokine production of spike-reactive non-naïve CD4+ T cells, defined by intracellular CD40L (iCD40L) expression. (E) Percentages of indicated intracellular cytokine production of iCD40L+ CD4+ T cells after stimulation with a pool of overlapping peptides (OLPs) covering the whole spike protein. Values are shown after subtracting the signal detected in paired unstimulated samples (HC n=19; IR n=11). Data from same HC as in main figure 1E are displayed. Grey and blue indicate time points post 2<sup>nd</sup> vaccination. White and light blue indicate time points post 3<sup>rd</sup> vaccination. Median values are depicted with 95% confidence interval error bars. Statistical analysis was performed by a two-tailed Mann–Whitney U test (A, B, E). Circles indicate vaccine-induced CD4+ T cell responses. Triangles indicate hybrid immunity.

## Supplemental Figure 4

**A**

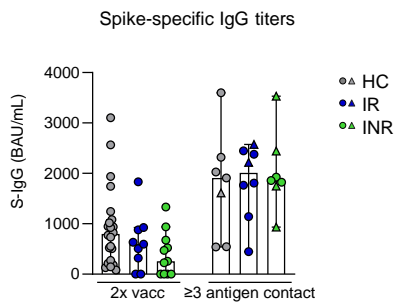

**B**

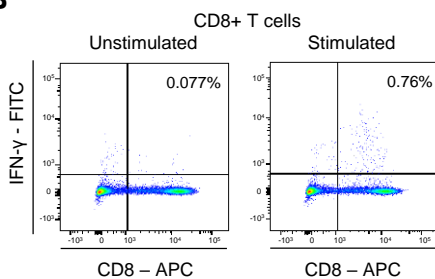

**C**

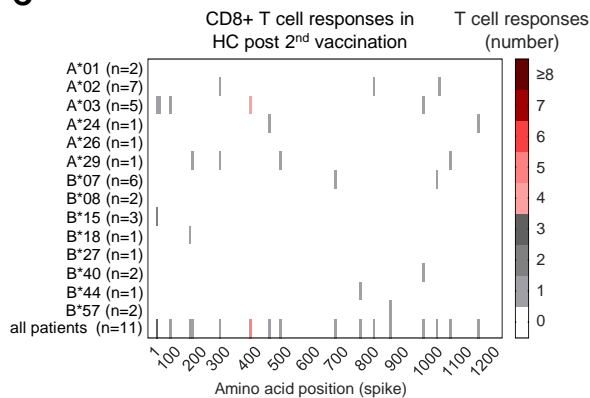

**D**

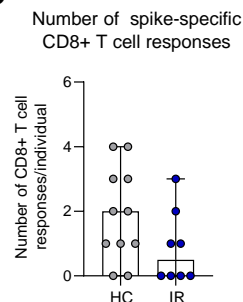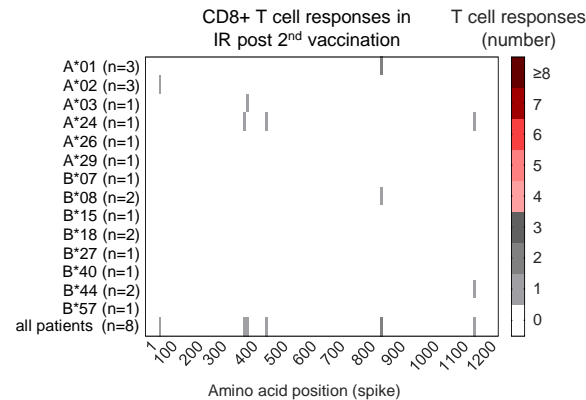

**Supplemental Figure 4. Diminished effector response in INR and IR. (A)** Spike-specific IgG levels at >90 days post 2<sup>nd</sup> vaccination (HC n=22; IR n=11; INR n=11) and after ≥3 antigen contacts (HC n=7; IR n=8; INR n=7) in HC, IR and INR. ≥3 antigen contacts refer to either 3 vaccinations or a combination of vaccination and infection. **(B)** Representative dot plots of unstimulated and peptide-stimulated CD8+ T cells. **(C)** Heatmap displays number and breadth of spike-specific CD8+ T cell responses to overlapping peptides (OLPs) of the spike protein in HC (n=11) and IR (n=8) >20 days post 2<sup>nd</sup> vaccination. Number of tested individuals (per HLA allotype and in total) and location of these epitopes within the spike protein are indicated. Data from same HC as in main figure 2A are displayed. **(D)** Number of CD8+ T cell responses per individual induced by stimulation with OLPs. Data from same HC as in main figure 2B are displayed. Median values are depicted with 95% confidence interval error bars. Statistical analysis was performed with a Kruskal-Wallis test and Dunn's multiple comparison test (A) and a two-tailed Mann-Whitney U test (D). Circles indicate vaccine-induced responses. Triangles indicate hybrid immunity.

## Supplemental Figure 5

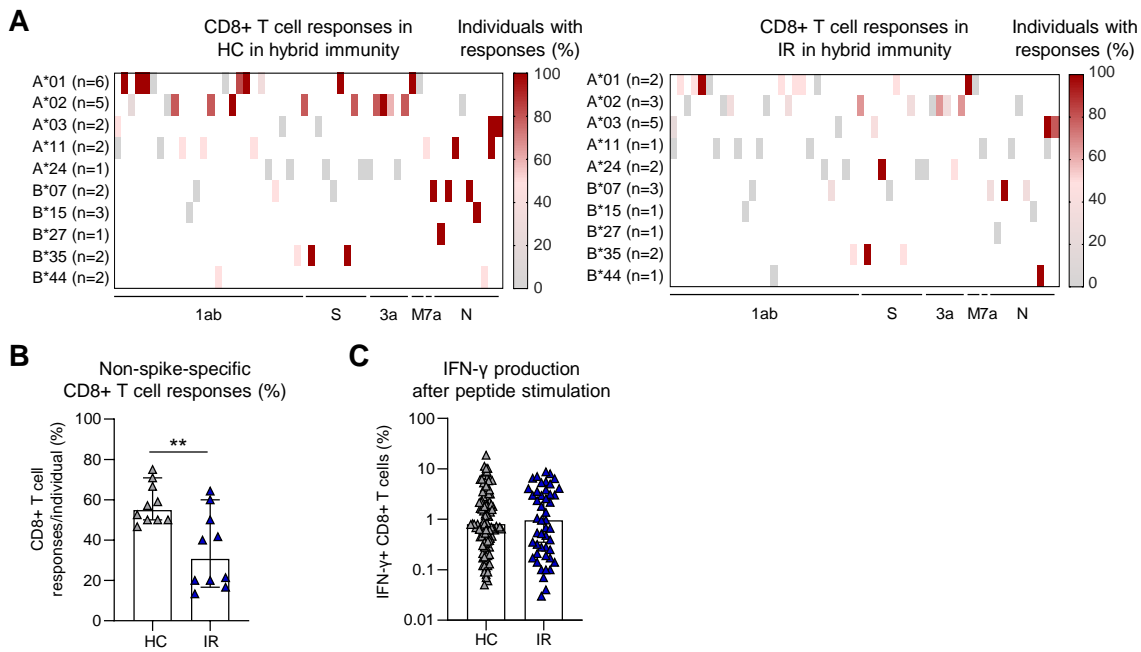

**Supplemental Figure 5. Restricted breadth of virus-specific CD8+ T cell responses in IR with hybrid immunity.** (A) SARS-CoV-2-specific CD8+ T cell responses of HC (n=10) and IR (n=10) after vaccination and infection (hybrid immunity). Percentages of SARS-CoV-2-specific CD8+ T cell responses are shown against epitopes within the complete WT SARS-CoV-2 proteome. These CD8+ T cell epitopes have been described to be restricted by the indicated HLA allotypes. (B, C) Percentages of HLA-matched non-spike-specific CD8+ T cell responses per individual (B) and intracellular IFN- $\gamma$  production (C) after stimulation with pre-described, optimal CD8+ T cell epitopes. Bar graph displays IFN- $\gamma$  production after peptide-specific stimulation. Values are shown after subtracting the signal detected in paired unstimulated samples. Data from same HC as in main figure 2C-E are displayed, respectively. Median values are depicted with 95% confidence interval error bars. Statistical analysis was performed with a two-tailed Mann–Whitney U test (B, C). Triangles indicate hybrid immunity.

## Supplemental Figure 6

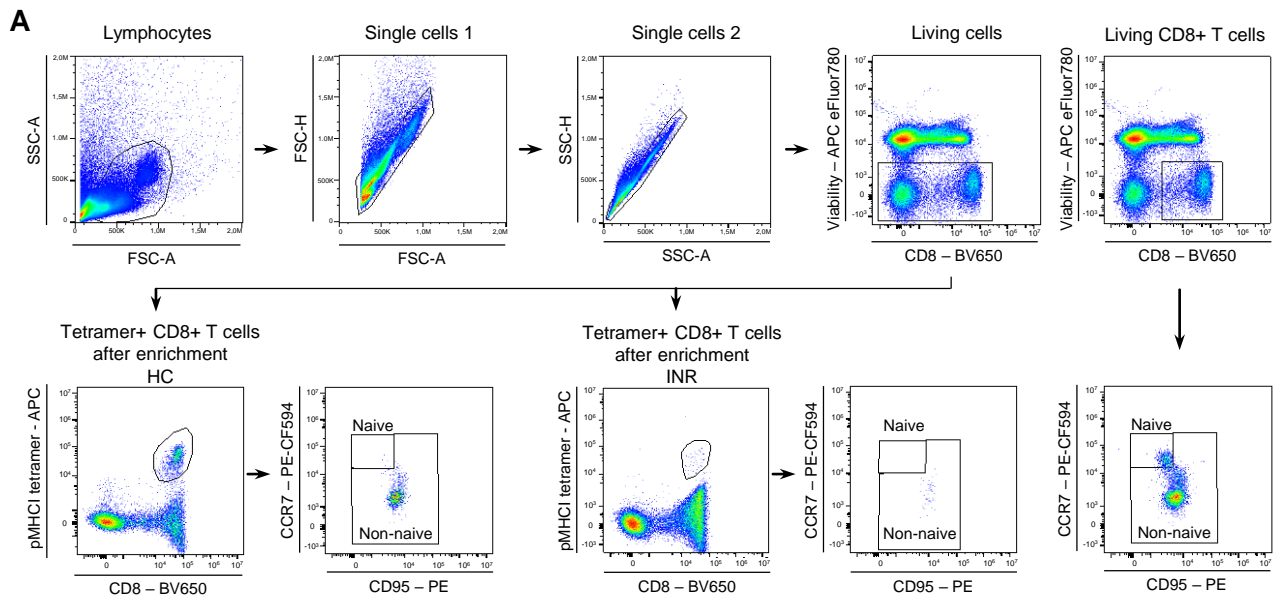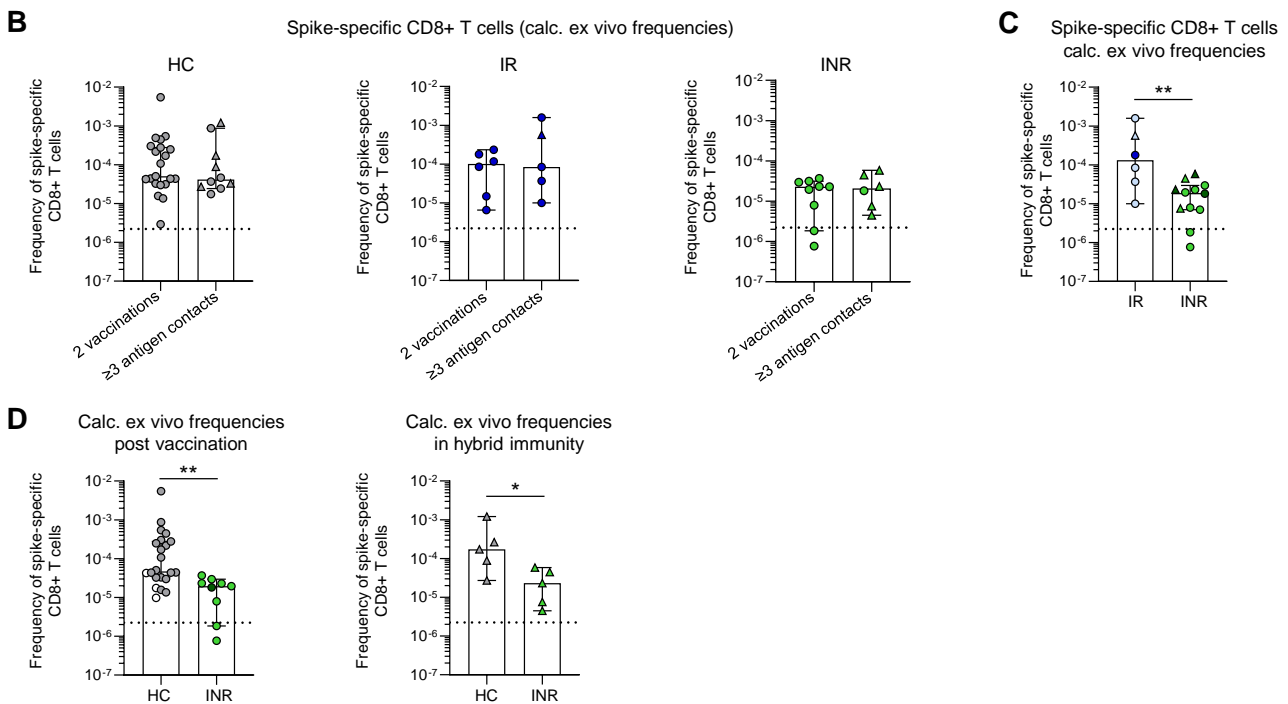

**Supplemental Figure 6. Reduced frequencies of virus-specific CD8+ T cells in INR after vaccination and in hybrid immunity.** (A) Gating strategy to detect SARS-CoV-2 spike-specific CD8+ T cells after pMHC class I tetramer-based enrichment. Exemplary dot plots are shown for spike-specific CD8+ T cells after pMHC class I tetramer-based enrichment in HC and INR. (B) Calculated ex vivo frequencies of spike-specific CD8+ T cells post 2<sup>nd</sup> vaccination and ≥3 antigen contacts in HC, IR and INR (2<sup>nd</sup> vaccination: HC n=21, IR n=6, INR n=9; ≥3 antigen contacts: HC n=10, IR n=5, INR n=6). (C) Calculated ex vivo frequencies of spike-specific CD8+ T cells in IR (n=6) and INR (n=12). Blue and green indicate time points post 2<sup>nd</sup> vaccination. Light blue and dark green indicate time points post 3<sup>rd</sup> vaccination. (D) Calculated ex vivo frequencies of vaccine-induced (HC n=22; INR n=9) spike-specific CD8+ T cells and after hybrid immunity (HC n=5; INR n=5). Statistical analysis was performed with a two-tailed Mann–Whitney U test (B–D). Circles indicate vaccine-induced CD8+ T cell responses. Triangles indicate hybrid immunity.

# Supplemental Figure 7

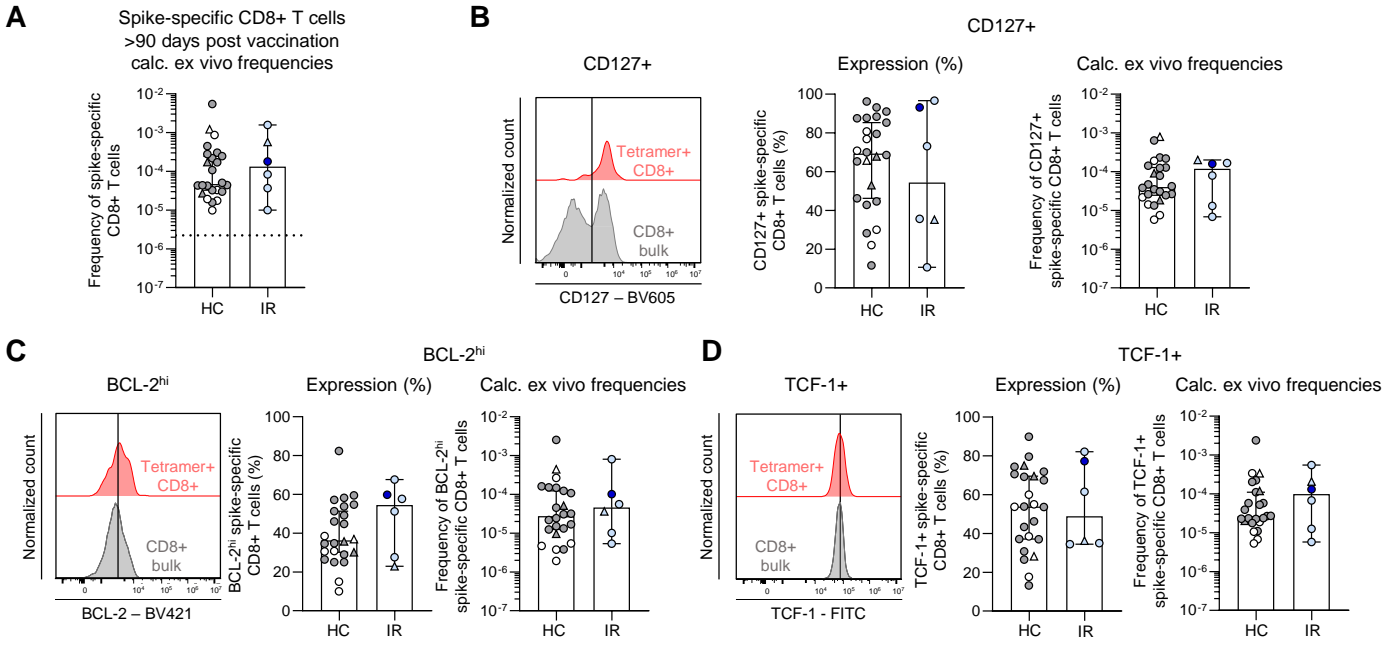

**Supplemental Figure 7. Robust memory formation of virus-specific CD8+ T cells in IR.** (A) Calculated ex vivo frequencies of spike-specific CD8+ T cells in HC (n=24) and IR (n=6). (B-D) Percentages and calculated ex vivo frequencies of (B) CD127+, (C) BCL-2<sup>hi</sup> and (D) TCF-1+ non-naive spike-specific CD8+ T cells. Grey and blue indicate time points post 2<sup>nd</sup> vaccination. White and light blue indicate time points post 3<sup>rd</sup> vaccination. Data from same HC as in main figure 3A-D are displayed, respectively. Median values are depicted with 95% confidence interval error bars. Statistical analysis was performed with a two-tailed Mann-Whitney U test (A-D). Circles indicate vaccine-induced CD8+ T cell responses. Triangles indicate hybrid immunity.

## Supplemental Figure 8

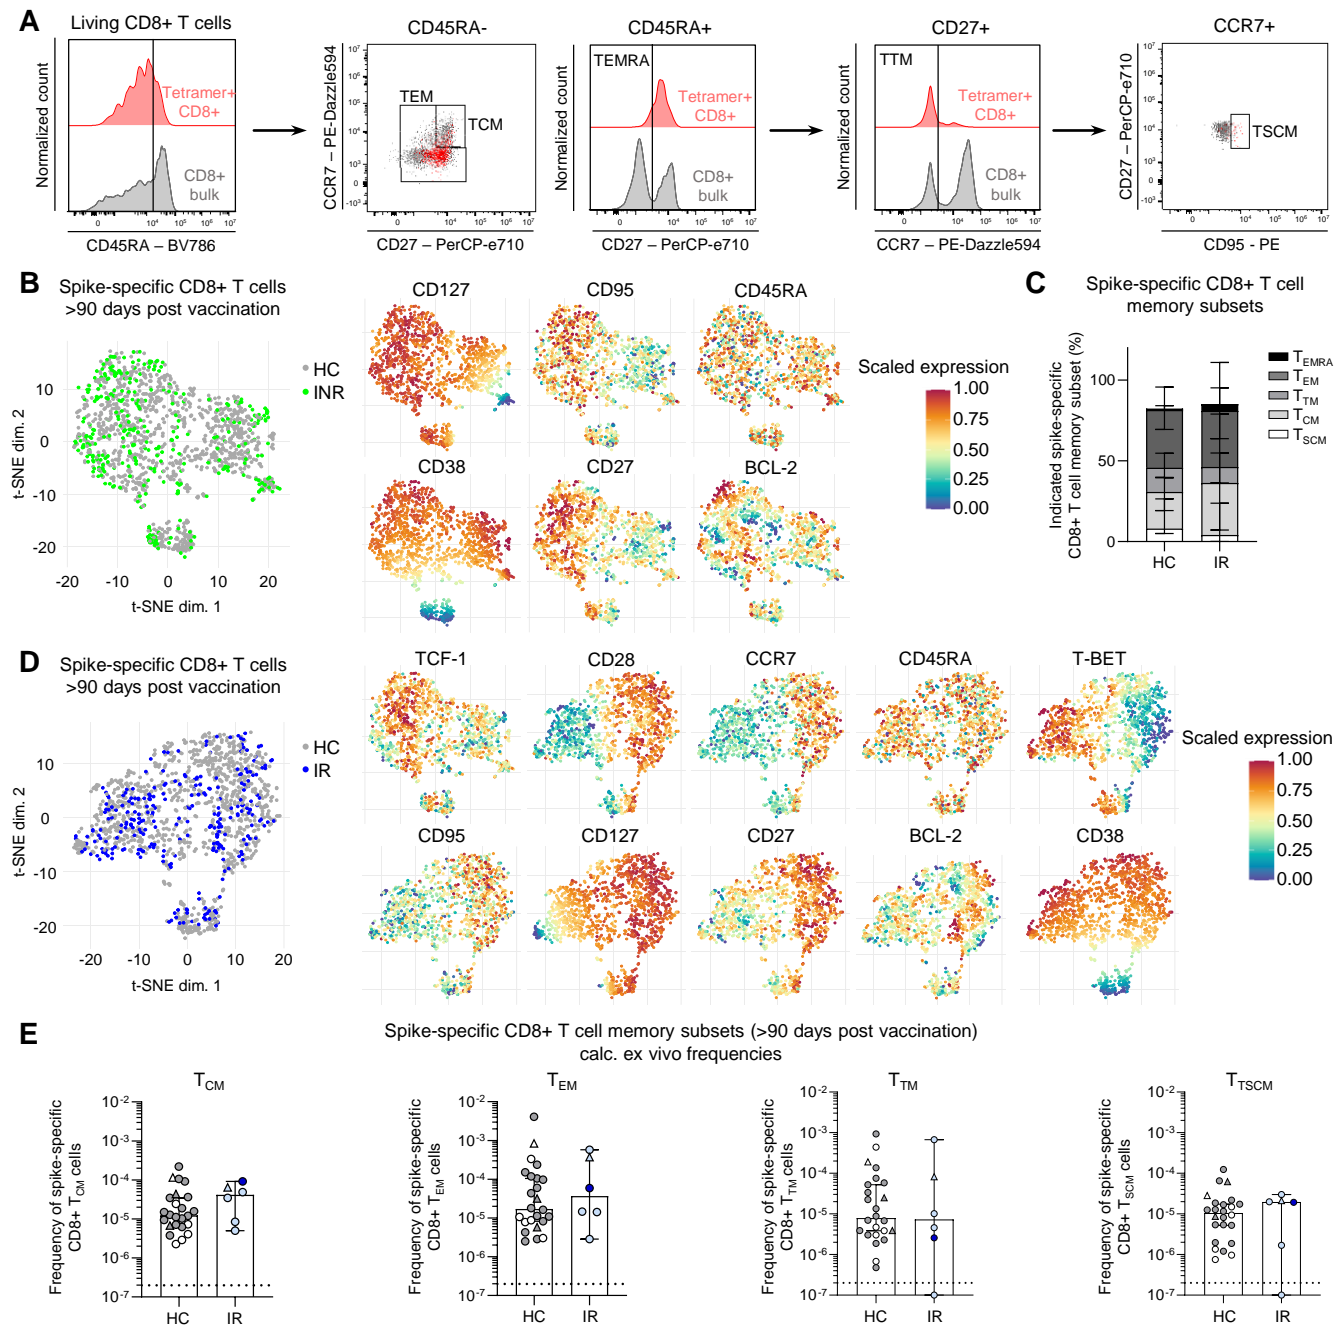

**Supplemental Figure 8. Similar subset diversification of virus-specific memory CD8+ T cells in IR and HC.** (A) Gating strategy to identify indicated CD8+ T cell memory subsets >90 days post vaccination. (B) t-SNE representation of flow cytometry data depicting non-naïve spike-specific CD8+ T cells >90 days post 2<sup>nd</sup> or 3<sup>rd</sup> mRNA vaccination in HC and INR (grey: HC post 1<sup>st</sup> boost (n=17) and post 2<sup>nd</sup> boost (n=6); green: INR post 1<sup>st</sup> boost (n=7) and post 2<sup>nd</sup> boost (n=2)). (C) Percentages of indicated spike-specific CD8+ T cell memory subsets in HC (n=24) and IR (n=6). T<sub>EMRA</sub>: terminally differentiated effector memory cells re-expressing CD45RA; T<sub>EM</sub>: effector memory; T<sub>TM</sub>: transitional memory; T<sub>CM</sub>: central memory; T<sub>SCM</sub>: stem cell-like memory. (D) t-SNE representation of flow cytometry data depicting non-naïve spike-specific CD8+ T cells >90 days post 2<sup>nd</sup> or 3<sup>rd</sup> mRNA vaccination in HC and IR (grey: HC post 1<sup>st</sup> boost (n=16) and post 2<sup>nd</sup> boost (n=7); blue: IR post 1<sup>st</sup> boost (n=1) and post 2<sup>nd</sup> boost (n=5)). (E) Calculated ex vivo frequencies of spike-specific CD8+ T cell memory subsets in HC (n=24) and IR (n=6). Grey and blue indicate time points post 2<sup>nd</sup> vaccination. White and light blue indicate time points post 3<sup>rd</sup> vaccination. Data from same HC as in main figure 3E-G are displayed (C-E). Median values are depicted with 95% confidence interval error bars. Statistical analysis was performed with a two-tailed Mann-Whitney U test (E). Circles indicate vaccine-induced CD8+ T cell responses. Triangles indicate hybrid immunity.



# Supplemental Figure 10

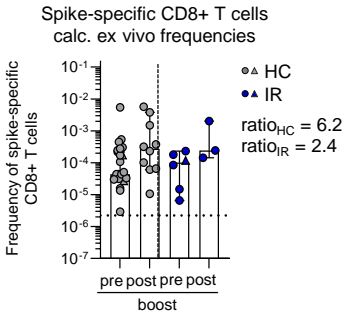

**Supplemental Figure 10. Similar in vivo recall responses of virus-specific CD8+ T cells in IR and HC.** Calculated ex vivo frequencies of spike-specific CD8+ T cells before (HC n=23; IR n=5) and 6-15 days post (HC n=10; IR n=3) 2<sup>nd</sup> boost. The ratio is calculated of the median frequency pre versus post 2<sup>nd</sup> boost of HC and IR, respectively. Data from same HC as in main figure 4E are displayed. Median values are depicted with 95% confidence interval error bars. Statistical analysis was performed with a Kruskal-Wallis test and Dunn's multiple comparison test to compare the frequencies of spike-specific CD8+ T cells pre versus post booster vaccination. Circles indicate vaccine-induced CD8+ T cell responses. Triangles indicate hybrid immunity.

# Supplemental Figure 11

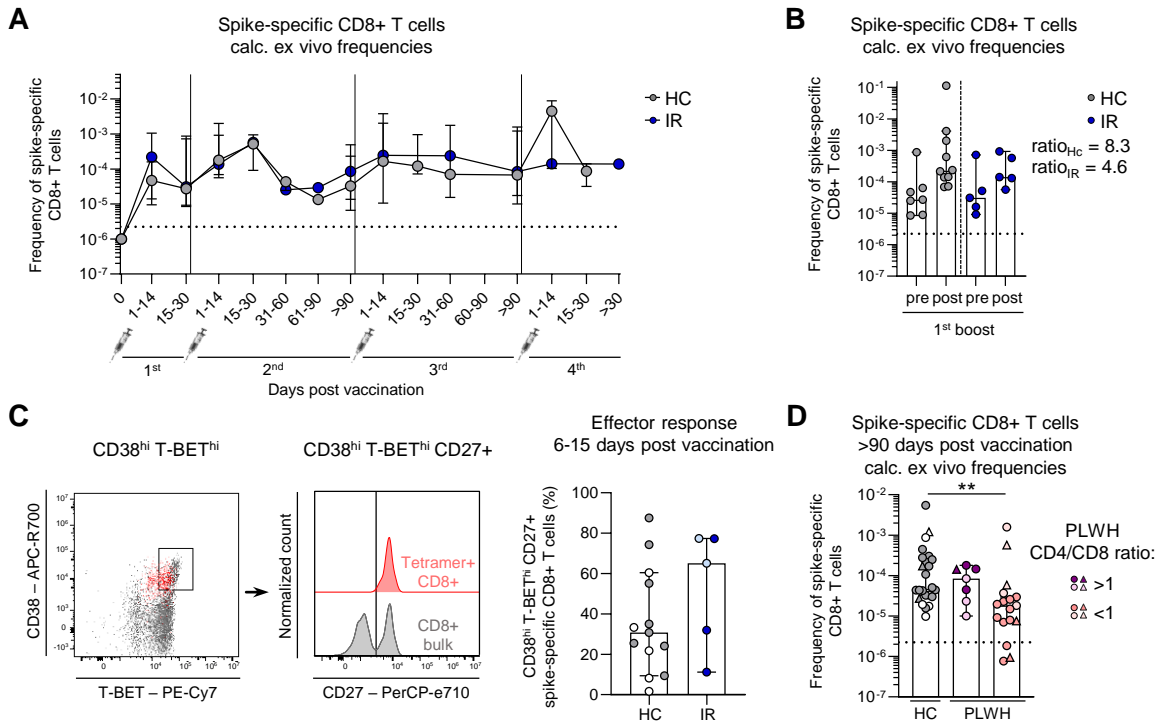

**Supplemental Figure 11. Similar activation and dynamics of spike-specific CD8+ T cell responses in IR and HC.** (A) Calculated ex vivo frequencies of spike-specific CD8+ T cells throughout 1<sup>st</sup>, 2<sup>nd</sup>, 3<sup>rd</sup> and 4<sup>th</sup> mRNA vaccination. Median is depicted of HC (n=9 post 3<sup>rd</sup> vaccination, of which n=3 are post 4<sup>th</sup> vaccination) and IR (n=5 post 3<sup>rd</sup> vaccination, of which n=2 are post 4<sup>th</sup> vaccination) (B) Calculated ex vivo frequencies of spike-specific CD8+ T cells before (HC n=7; IR n=5) and 6-15 days post (HC n=10; IR n=5) 1<sup>st</sup> booster. The ratio is calculated of the median frequency pre versus post boost of HC and IR, respectively. (C) Representative plots and percentages are shown of CD38<sup>hi</sup> T-BET<sup>hi</sup> CD27<sup>+</sup> non-naïve spike-specific CD8+ T cells 6-15 days post booster vaccination in HC (n=13) and IR (n=5). Grey and blue indicate time points post 2<sup>nd</sup> vaccination. White and light blue indicate time points post 3<sup>rd</sup> vaccination. (D) Calculated ex vivo frequencies of spike-specific CD8+ T cells are depicted from HC (n=24) and PLWH (n=24) >90 days post 2<sup>nd</sup> (dark colors) or 3<sup>rd</sup> (light colors) mRNA vaccination. Frequencies of spike-specific CD8+ T cells of PLWH are shown depending on their CD4/CD8 ratio (>1 n=7; <1 n=17). Data from same HC as in main figure 6A-C (A-C) and 6G (D) are displayed. Median values are depicted with 95% confidence interval error bars. Statistical analysis was performed with a Kruskal-Wallis test and Dunn's multiple comparison test (B, D) and a two-tailed Mann-Whitney U test (C). Circles indicate vaccine-induced CD8+ T cell responses. Triangles indicate hybrid immunity.

**Supplemental Table 1: Characteristics of HIV-infected immunological non-responders (INR)**

| Donor ID | Sex | Age | HLA type                                                                   | CD4+ T cell count | CDC Stadium | CD4/CD8 ratio | HIV RNA |
|----------|-----|-----|----------------------------------------------------------------------------|-------------------|-------------|---------------|---------|
| P1       | m   | 48  | A*0301, A*2402, B*2705, B*4901, DQB1*0501, DQB1*0604, DRB1*0101, DRB1*1302 | 194               | B3          | 0.39          | <20     |
| P2       | m   | 56  | A*2402, B*1302, B*2705, DQB1*0202, DQB1*0503, DRB1*07101, DRB1*1454        | 300               | C3          | 1.16          | <20     |
| P3       | m   | 32  | A*0201, A*0301, B*0702, B*3801, DQB1*0301, DQB1*0603, DRB1*1101, DRB1*1301 | 152               | B3          | 0.18          | <20     |
| P4       | m   | 54  | A*0101, A*0201, B*1501, DQB1*0501, DQB1*0603, DRB1*0101, DRB1*1301         | 129               | C3          | 0.33          | <20     |
| P5       | f   | 57  | A*0101, A*0201, B*0801, B*3701, DQB1*0201, DQB1*0502, DRB1*0301, DRB1*1501 | 298               | C3          | 0.31          | <20     |
| P6       | m   | 35  | A*2301, A*3001, B*4202, B*5301, DQB1*0301, DQB1*0319, DRB1*0804, DRB1*1304 | 89                | B3          | 0.04          | 6010    |
| P7       | f   | 43  | A*0101, B*0801, DQB1*0201, DRB1*0301                                       | 153               |             | 0.2           | <20     |
| P8       | m   | 39  | A*1101, A*2402, B*4405, B*5501, DQB1*0501, DQB1*0503, DRB1*0101, DRB1*1454 | 287               | A3          | 0.3           | <20     |
| P9       | m   | 43  | A*0201, A*2301, B*0706, B*5101, DQB1*0202, DQB1*0301, DRB1*0901, DRB1*1303 | 277               | B2          | 1.25          | <20     |
| P10      | m   | 52  | A*0301, B*1801, B*4403, DQB1*0202, DQB1*0301, DRB1*0701, DRB1*1201         | 287               | C3          | 0.3           | <20     |
| P11      | m   | 34  | A*0201, A*0202, B*4501, B*5102, DQB1*0202, DQB1*0319, DRB1*0901, DRB1*1102 | 114               | A3          | 0.14          | <20     |
| P12      | f   | 52  | A*0301, A*2301, B*0702, B*1503, DQB1*0319, DQB1*0602, DRB1*1101, DRB1*1501 | 202               |             | 0.22          | <20     |
| P13      | m   | 73  | A*1101, A*2402, B*1513, B*3802, DQB1*0301, DRB1*1202                       | 186               | C3          | 0.35          | <20     |
| P14      | m   | 61  | A*0101, A*6801, B*0702, B*0801, DQB1*0201, DQB1*0602, DRB1*0301, DRB1*1501 | 295               | B2          | 1.33          | <20     |
| P15      | m   | 53  | A*0201, B*3501, B*4405, DQB1*0302, DQB1*0402, DRB1*0404, DRB1*0801         | 157               | C3          | 0.27          | <20     |
| P16      | m   | 28  | A*3303, A*8001, B*0801, B*5801, DQB1*0501, DQB1*0609, DRB1*1001, DRB1*1302 | 62                | A3          | 0.12          | 73      |
| P17      | m   | 38  | A*0201, A*2902, B*4402, B*4403, DQB1*0202, DQB1*0301, DRB1*0401, DRB1*0701 | 144               | C3          | 0.17          | <20     |

**Supplemental Table 2: Characteristics of HIV-infected immunological responders (IR)**

| Donor ID | Sex | Age | HLA type                                                                    | CD4+ T cell count | CDC Stadium | CD4/CD8 ratio | HIV RNA |
|----------|-----|-----|-----------------------------------------------------------------------------|-------------------|-------------|---------------|---------|
| P18      | m   | 49  | A*0201, A*0301, B*4402, B*5601, DQB1*0602, DQB1*0603, DRB1*1301, DRB1*1501  | 506               | C3          | 0.59          | <20     |
| P19      | m   | 41  | A*0101, A*1101, B*1803, B*5001, DQB1*0202, DQB1*0501, DRB1*0101, DRB1*0701  | 1262              | B1          | 1.68          | <20     |
| P20      | m   | 53  | A*0301, A*2902, B*4901, B*8101, DQB1*0301, DQB1*0302, DRB1*0405, DRB1*1303  | 708               | C3          | 0.62          | <20     |
| P21      | m   | 46  | A*0201, B*1501, B*1801, DQB1*0301, DQB1*0501, DRB1*0101, DRB1*1104          | 846               | B1          | 1.13          | <20     |
| P22      | m   | 35  | A*1101, A*2902, B*0702, B*2705, DQB1*0501, DQB1*0602, DRB1*0101, DRB1*1501  | 994               | B1          | 0.82          | <20     |
| P23      | m   | 58  | A*0201, B*0702, B*1801, DQB1*0301, DQB1*0604, DRB1*1104, DRB1*1301          | 640               | A3          | 0.75          | <20     |
| P24      | m   | 61  | A*2301, A*7401, B*0702, B*5001, DQB1*0202, DQB1*0602, DRB1*0701, DRB1*1503  | 563               | B2          | 0.74          | <20     |
| P25      | m   | 47  | A*0201, A*0301, B*4403, B*4901, DQB1*0301, DQB1*0501, DRB1*0102, DRB1*0803  | 716               | A2          | 1.49          | <20     |
| P26      | f   | 39  | A*0301, A*2601, B*07199, B*3801, DQB1*0302, DQB1*0602, DRB1*0404, DRB1*1501 | 450               | C3          | 1.17          | <20     |
| P27      | m   | 36  | A*2402, A*7406, B*40, B*44, DQB1*0501, DQB1*0602, DRB1*0101, DRB1*1501      | 518               | C3          | 0.65          | <20     |
| P28      | m   | 63  | A*0301, A*3201, B*1517, B*2705, DQB1*0301, DQB1*0604, DRB1*0401, DRB1*1302  | 611               | A3          | 0.91          | <20     |
| P29      | m   | 89  | A*0301, A*1101, B*4427, B*5101, DQB1*0402, DQB1*0502, DRB1*0801, DRB1*1601  | 743               | B2          | 2.38          | <20     |
| P30      | f   | 40  | A*0101, A*0301, B*0801, B*3501, DQB1*0201, DQB1*0501, DRB1*0101, DRB1*0301  | 513               | A2          | 1.27          | <20     |
| P31      | m   | 56  | A*0201, B*0702, B*1302, DQB1*0501, DQB1*0503, DRB1*0101, DRB1*1454          | 1018              | A2          | 1.51          | <20     |
| P32      | m   | 28  | A*0201, A*0202, B*0801, B*3501, DQB1*0319, DRB1*1101, DRB1*1304             | 670               | C2          | 2.74          | <20     |
| P33      | m   | 28  | A*0201, A*0301, B*0702, B*3501, DQB1*0301, DQB1*0602, DRB1*1101, DRB1*1501  | 468               |             | 1.27          | <20     |
| P34      | m   | 49  | A*0101, A*0201, B*2702, B*4405, DQB1*0501, DQB1*0502, DRB1*0101, DRB1*1601  | 931               | A2          | 2.39          | <20     |
| P35      | m   | 44  | A*0201, A*3201, B*1801, B*5107, DQB1*0301, DQB1*0502, DRB1*1101, DRB1*1602  | 426               | A2          | 0.49          | <20     |
| P36      | m   | 54  | A*0101, A*0201, B*0801, B*3701, DQB1*0302, DQB1*0303, DRB1*0401, DRB1*0701  | 575               | A2          | 0.61          | <20     |
| P37      | m   | 58  | A*0301, A*2402, B*0702, B*4405, DQB1*0501, DQB1*0503, DRB1*0101, DRB1*1454  | 587               | A2          | 0.81          | <20     |
| P38      | m   | 48  | A*0201, A*3402, B*4402, B*4403, DQB1*0602, DRB1*1501, DRB1*1503             | 1106              | B2          | 1.67          | <20     |
| P39      | m   | 51  | A*1101, A*2601, B*3501, B*5701, DQB1*0303, DQB1*0501, DRB1*0101, DRB1*0701  | 976               | A1          | 1.33          | <20     |
| P40      | m   | 43  | A*0101, A*0301, B*0801, B*3503, DQB1*0201, DQB1*0503, DRB1*0301, DRB1*1454  | 777               | A2          | 0.89          | <20     |
| P41      | m   | 79  | A*0101, A*2402, B*0801, B*2705, DQB1*0201, DQB1*0503, DRB1*0301, DRB1*1454  | 354               |             | 0.37          | <20     |
| P42      | m   | 41  | A*2501, A*3201, B*3503, B*5101, DQB1*0302, DQB1*0402, DRB1*0401, DRB1*0801  | 842               | A2          | 0.86          | <20     |
| P43      | f   | 62  | A*0101, A*0201, B*0702, B*5701, DQB1*0303, DRB1*0701                        | 407               | B3          | 0.72          | <20     |
| P44      | f   | 62  | A*0101, A*0201, B*4402, B*5701, DQB1*0302, DQB1*0602, DRB1*0401, DRB1*1501  | 328               | C3          | 0.29          | <20     |

**Supplemental Table 3: Overview of SARS-CoV-2 infection history in people living with HIV and immunological analyses**

| Donor ID | Cohort | Infection prior vaccination | Infection post vaccination | CD8+ T cell analyses | CD4+ T cell analyses | Serum S-IgG1 assay |
|----------|--------|-----------------------------|----------------------------|----------------------|----------------------|--------------------|
| P1       | INR    |                             | 07/2022                    | yes                  | yes                  | yes                |
| P2       | INR    |                             | yes                        | yes                  | yes                  | yes                |
| P3       | INR    |                             | 10/2022;<br>03/2023        | yes                  |                      | yes                |
| P4       | INR    |                             | 07/2022                    | yes                  |                      | yes                |
| P5       | INR    |                             | spring 2022                | yes                  | yes                  | yes                |
| P6       | INR    |                             | yes                        | yes                  | yes                  |                    |
| P7       | INR    |                             |                            | yes                  | yes                  | yes                |
| P8       | INR    |                             | 07/2022                    | yes                  | yes                  |                    |
| P9       | INR    | yes                         | yes                        | yes                  | yes                  | yes                |
| P10      | INR    |                             | 02/2022                    | yes                  | yes                  | yes                |
| P11      | INR    | yes                         |                            | yes                  |                      | yes                |
| P12      | INR    |                             | 07/2022                    | yes                  | yes                  | yes                |
| P13      | INR    |                             |                            | yes                  | yes                  |                    |
| P14      | INR    |                             | 09/2022                    | yes                  | yes                  | yes                |
| P15      | INR    |                             |                            | yes                  | yes                  | yes                |
| P16      | INR    |                             |                            | yes                  | yes                  | yes                |
| P17      | INR    |                             |                            | yes                  | yes                  | yes                |
| P18      | IR     |                             |                            | yes                  | yes                  | yes                |
| P19      | IR     |                             |                            | yes                  | yes                  | yes                |
| P20      | IR     |                             |                            | yes                  | yes                  | yes                |
| P21      | IR     |                             |                            | yes                  | yes                  | yes                |
| P22      | IR     |                             |                            | yes                  | yes                  |                    |
| P23      | IR     |                             |                            | yes                  | yes                  | yes                |
| P24      | IR     |                             | yes                        | yes                  |                      |                    |
| P25      | IR     |                             | 03/2022                    | yes                  | yes                  | yes                |
| P26      | IR     |                             |                            | yes                  |                      |                    |
| P27      | IR     |                             | 10/2022                    | yes                  | yes                  |                    |
| P28      | IR     |                             | winter 2021/2022           | yes                  |                      |                    |
| P29      | IR     |                             | 03/2022                    | yes                  |                      |                    |
| P30      | IR     |                             | 07/2022                    | yes                  | yes                  | yes                |
| P31      | IR     |                             | 04/2023                    | yes                  | yes                  | yes                |
| P32      | IR     |                             | 10/2021                    | yes                  |                      |                    |
| P33      | IR     |                             | 01/2022                    | yes                  |                      |                    |
| P34      | IR     |                             |                            | yes                  | yes                  | yes                |
| P35      | IR     |                             |                            | yes                  |                      |                    |
| P36      | IR     |                             |                            | yes                  | yes                  | yes                |
| P37      | IR     |                             | 03/2022                    | yes                  |                      |                    |
| P38      | IR     |                             |                            | yes                  | yes                  |                    |
| P39      | IR     |                             |                            | yes                  | yes                  |                    |
| P40      | IR     |                             | 12/2021                    | yes                  | yes                  |                    |
| P41      | IR     | yes                         | 10/2022                    | yes                  |                      |                    |
| P42      | IR     |                             |                            | yes                  | yes                  | yes                |
| P43      | IR     |                             |                            | yes                  |                      |                    |
| P44      | IR     |                             |                            | yes                  |                      |                    |

**Supplemental Table 4: Characteristics of HIV-uninfected, healthy controls (HC)**

| Donor ID | Sex | Age | HLA type                                                                   |
|----------|-----|-----|----------------------------------------------------------------------------|
| H1       | m   | 41  | A*0101, A*0301, B*0801, B*3501, DQB1*0201, DQB1*0501, DRB1*0101, DRB1*0301 |
| H2       | m   | 31  | A*0201, A*0301, B*1501, B*5703, DQB1*0302, DQB1*0602, DRB1*0401, DRB1*1401 |
| H3       | f   | 38  | A*0201, A*2601, B*0702, B*3801, DQB1*0602, DQB1*0603, DRB1*1301, DRB1*1501 |
| H4       | f   | 30  | A*2601, B*0702, B*3801, DQB1*0302, DQB1*0602, DRB1*0401, DRB1*1501         |
| H5       | m   | 43  | A*0301, A*3201, B*0702, B*4002, DQB1*0301, DQB1*0503, DRB1*1101, DRB1*1454 |
| H6       | m   | 69  | A*0201, B*1302, B*1501, DQB1*0202, DQB1*0302, DRB1*0401, DRB1*0701         |
| H7       | f   | 48  | A*0301, A*6901, B*3508, B*5101, DQB1*0502, DQB1*0603, DRB1*1301, DRB1*1602 |
| H8       | m   | 41  | A*0101, A*0201, B*0801, B*4001, DQB1*0301, DQB1*0602, DRB1*1402, DRB1*1501 |
| H9       | f   | 35  | A*0101, A*0301, B*0702, B*5701, DQB1*0303, DQB1*0602, DRB1*0701, DRB1*1501 |
| H10      | f   | 27  | A*0201, B*0702, B*0801, DQB1*0201, DQB1*0402, DRB1*0301, DRB1*0801         |
| H11      | m   | 48  | A*0101, A*1101, B*0801, B*1501, DQB1*0201, DQB1*0501, DRB1*0101, DRB1*0301 |
| H12      | m   | 32  | A*0301, B*0702, B*4402, DQB1*0301, DQB1*0603, DRB1*11198, DRB1*1501        |
| H13      | f   | 60  | A*0201, B*0702, B*4402, DQB1*0301, DQB1*0602, DRB1*0401, DRB1*1501         |
| H14      | f   | 29  | A*0101, A*3301, B*1402, B*5701, DQB1*0201, DQB1*0602, DRB1*0301, DRB1*1501 |
| H15      | f   | 44  | A*0101, A*1101, B*1517, B*3501, DQB1*0501, DQB1*0604, DRB1*0103, DRB1*1302 |
| H16      | m   | 31  | A*0101, A*0301, B*0801, B*1801, DQB1*0201, DQB1*0603, DRB1*0301, DRB1*1301 |
| H17      | m   | 47  | A*0201, A*2402, B*2705, B*5101, DQB1*0301, DRB1*1101, DRB1*1104            |
| H18      | f   | 50  | A*0301, B*0702, B*2705, DQB1*0301, DQB1*0603, DRB1*1303, DRB1*1501         |
| H19      | f   | 28  | A*0101, A*0301, B*2705, B*3701, DQB1*0301, DQB1*0501, DRB1*1001, DRB1*1201 |
| H20      | f   | 48  | A*0101, A*2402, B*1302, B*5701, DQB1*0202, DQB1*0301, DRB1*0701, DRB1*1201 |
| H21      | f   | 26  | A*0201, A*3101, B*0702, B*4501, DQB1*0301, DQB1*0602, DRB1*0401, DRB1*1501 |
| H22      | m   | 60  | A*0201, B*0801, B*1501, DQB1*0201, DQB1*0301, DRB1*0301, DRB1*1101         |
| H23      | m   | 63  | A*0101, A*0201, B*0801, B*1501, DQB1*0301, DQB1*0402, DRB1*0801, DRB1*1101 |
| H24      | f   | 52  | A*0201, A*6801, B*1501, B*4402, DQB1*0301, DQB1*0503, DRB1*1103, DRB1*1454 |
| H25      | f   | 52  | A*0101, A*2402, B*0801, B*2705, DQB1*0202, DQB1*0501, DRB1*0101, DRB1*0701 |
| H26      | m   | 35  | A*0201, A*6801, B*1501, B*5101, DQB1*0302, DQB1*0501, DRB1*0101, DRB1*0401 |
| H27      | m   | 25  | A*0201, A*2902, B*4501, B*5101, DQB1*0301, DQB1*0603, DRB1*0401, DRB1*1301 |
| H28      | f   | 32  | A*0101, B*5701, DQB1*0301, DQB1*0303, DRB1*0701, DRB1*1101                 |
| H29      | m   | 31  | A*0301, A*3001, B*1302, B*3501, DQB1*0301, DQB1*0602, DRB1*1201, DRB1*1501 |
| H30      | m   | 36  | A*0101, A*2402, B*0702, B*2705, DQB1*0502, DQB1*0602, DRB1*1501, DRB1*1601 |
| H31      | f   | 78  | A*0201, A*0301, B*0702, B*1801, DQB1*0503, DQB1*0602, DRB1*1454, DRB1*1501 |
| H32      | m   | 25  | A*0301, A*6801, B*1402, B*4402, DQB1*0301, DQB1*0609, DRB1*1201, DRB1*1302 |
| H33      | f   | 26  | A*0301, A*7401, B*0702, B*1503, DQB1*0301, DQB1*0602, DRB1*1101, DRB1*1501 |
| H34      | f   | 24  | A*0101, A*0301, B*0801, B*3501, DQB1*0302, DQB1*0501, DRB1*0101, DRB1*0401 |
| H35      | f   | 55  | A*0101, A*0201, B*0801, B*1501, DQB1*0302, DQB1*0303, DRB1*0401, DRB1*0901 |
| H36      | m   | 27  | A*0101, A*2501, B*0801, B*4402, DQB1*0501, DRB1*0101                       |
| H37      | f   | 22  | A*0101, A*0201, B*1501, B*4403, DQB1*0202, DQB1*0603, DRB1*0701, DRB1*1301 |
| H38      | f   | 27  | A*0201, A*0202, B*4101, B*5701, DQB1*0603, DQB1*0609, DRB1*1301, DRB1*1302 |
| H39      | f   | 21  | A*0201, A*1101, B*3501, B*5101, DQB1*0402, DQB1*0501, DRB1*0101, DRB1*0801 |

**Supplemental Table 5: Overview of SARS-CoV-2 infection history in healthy controls and immunological analyses**

| Donor ID | Cohort | Infection post vaccination | CD8+ T cell analyses | CD4+ T cell analyses | Serum S-IgG1 assay |
|----------|--------|----------------------------|----------------------|----------------------|--------------------|
| H1       | HC     | 01/2022                    | yes                  | yes                  |                    |
| H2       | HC     |                            | yes                  | yes                  | yes                |
| H3       | HC     | 03/2022                    | yes                  | yes                  | yes                |
| H4       | HC     |                            | yes                  | yes                  |                    |
| H5       | HC     |                            | yes                  | yes                  |                    |
| H6       | HC     |                            | yes                  | yes                  | yes                |
| H7       | HC     |                            | yes                  | yes                  | yes                |
| H8       | HC     |                            | yes                  | yes                  | yes                |
| H9       | HC     |                            | yes                  | yes                  |                    |
| H10      | HC     |                            | yes                  | yes                  | yes                |
| H11      | HC     | 02/2022                    | yes                  | yes                  | yes                |
| H12      | HC     |                            | yes                  | yes                  | yes                |
| H13      | HC     |                            | yes                  | yes                  | yes                |
| H14      | HC     | 05/2022                    | yes                  | yes                  | yes                |
| H15      | HC     |                            | yes                  |                      | yes                |
| H16      | HC     |                            | yes                  | yes                  | yes                |
| H17      | HC     |                            | yes                  | yes                  |                    |
| H18      | HC     |                            | yes                  | yes                  | yes                |
| H19      | HC     |                            | yes                  | yes                  | yes                |
| H20      | HC     |                            | yes                  |                      |                    |
| H21      | HC     |                            | yes                  | yes                  | yes                |
| H22      | HC     |                            | yes                  | yes                  | yes                |
| H23      | HC     | 11/2021                    | yes                  | yes                  | yes                |
| H24      | HC     |                            | yes                  | yes                  | yes                |
| H25      | HC     | yes                        | yes                  |                      | yes                |
| H26      | HC     |                            | yes                  |                      | yes                |
| H27      | HC     |                            | yes                  | yes                  |                    |
| H28      | HC     | yes                        | yes                  |                      | yes                |
| H29      | HC     |                            | yes                  |                      | yes                |
| H30      | HC     | 01/2022                    | yes                  |                      |                    |
| H31      | HC     |                            | yes                  | yes                  |                    |
| H32      | HC     | 03/2022                    | yes                  | yes                  | yes                |
| H33      | HC     | yes                        | yes                  | yes                  | yes                |
| H34      | HC     |                            | yes                  | yes                  | yes                |
| H35      | HC     |                            | yes                  |                      | yes                |
| H36      | HC     | yes                        | yes                  |                      |                    |
| H37      | HC     | 01/2022                    | yes                  |                      |                    |
| H38      | HC     | 04/2022                    | yes                  |                      |                    |
| H39      | HC     | 05/2022                    | yes                  |                      |                    |

**Supplemental Table 6: In this study analyzed optimal CD8+ T cell epitopes**

| Epitope                           | Amino acid sequence |
|-----------------------------------|---------------------|
| A*03/11/ORF1ab <sub>808-816</sub> | VTNNTFTLK           |
| A*01/ORF1ab <sub>1321-1329</sub>  | PTDNYITTY           |
| A*02/ORF1ab <sub>1566-1574</sub>  | RTIKVFTTV           |
| A*01/ORF1ab <sub>1636-1646</sub>  | HTDPSFLGRY          |
| A*01/ORF1ab <sub>1637-1646</sub>  | TTDPSFLGRY          |
| A*01/ORF1ab <sub>1889-1899</sub>  | CTEIDPKLDNY         |
| A*11/ORF1ab <sub>2192-2200</sub>  | ASMPTTIAK           |
| A*02/ORF1ab <sub>2297-2307</sub>  | SLDTYPSLETI         |
| A*02/ORF1ab <sub>2332-2340</sub>  | ILFTRFFYV           |
| A*11/ORF1ab <sub>2600-2608</sub>  | STFNVPMEK           |
| B*15/ORF1ab <sub>2788-2796</sub>  | YLITPVHVM           |
| B*07/ORF1ab <sub>2949-2956</sub>  | RPDTRYVL            |
| A*11/ORF1ab <sub>3622-3630</sub>  | SAFAMMFVK           |
| A*02/ORF1ab <sub>3886-3894</sub>  | KLWAQCVQL           |
| B*44/ORF1ab <sub>3946-3954</sub>  | SEFSSLPSY           |
| A*01/ORF1ab <sub>4082-4091</sub>  | NTCDGTTFTY          |
| A*02/ORF1ab <sub>4094-4102</sub>  | ALWEIQQVV           |
| A*01/ORF1ab <sub>4163-4171</sub>  | CTDDNALAY           |
| A*01/ORF1ab <sub>4163-4172</sub>  | CTDDNALAYY          |
| A*11/ORF1ab <sub>4216-4224</sub>  | VTDTPKGPK           |
| A*01/ORF1ab <sub>5130-5138</sub>  | DTDFVNEFY           |
| A*24/ORF1ab <sub>5137-5145</sub>  | FYAYLRKHF           |
| B*07/ORF1ab <sub>5196-5924</sub>  | IPRRNVATL           |
| A*03/ORF1ab <sub>5533-5542</sub>  | VVYRGTTTTYK         |
| A*24/ORF1ab <sub>5721-5729</sub>  | VYIGDPAQL           |
| B*35/S <sub>84-92</sub>           | LPFNDGVYF           |
| A*02/S <sub>269-277</sub>         | YLQPRTFLL           |
| B*35/S <sub>321-329</sub>         | QPTESIVRF           |
| A*03/S <sub>378-386</sub>         | KCYGVSPTK           |
| A*24/S <sub>448-456</sub>         | NYNYLYRLF           |
| B*07/S <sub>680-688</sub>         | SPRRARVA            |
| A*01/S <sub>865-873</sub>         | LTDEMIAQY           |
| B*35/S <sub>896-904</sub>         | IPFAMQMAY           |
| A*02/S <sub>1000-1008</sub>       | RLQSLQTYV           |
| A*24/S <sub>1208-1216</sub>       | QYIKWPWYI           |
| A*24/S <sub>1211-1220</sub>       | KWPWYIWLGF          |
| A*02/ORF3a <sub>72-80</sub>       | ALSKGVHVV           |
| A*02/ORF3a <sub>82-90</sub>       | NLLLLFVTV           |
| A*02/ORF3a <sub>107-115</sub>     | YLYALVYFL           |
| A*24/ORF3a <sub>112-120</sub>     | VYFLQSINF           |
| A*02/ORF3a <sub>139-147</sub>     | LLYDANYFL           |
| A*01/ORF3a <sub>207-215</sub>     | FTSDYYQLY           |
| A*01/M <sub>171-179</sub>         | ATSRTLSTYY          |
| A*11/M <sub>171-180</sub>         | ATSRTLSTYYK         |

| Epitope                      | Amino acid sequence |
|------------------------------|---------------------|
| B*07/ORF7a <sub>78-86</sub>  | RARSVSPKL           |
| B*27/N <sub>9-17</sub>       | QRNAPRITF           |
| B*07/N <sub>105-113</sub>    | SPRWYFYLL           |
| A*11/N <sub>134-143</sub>    | ATEGALNTPK          |
| A*02/N <sub>222-230</sub>    | LLLDRLNQL           |
| B*07/N <sub>257-265</sub>    | KPRQKRTAT           |
| B*15/N <sub>305-314</sub>    | AQFAPSASAF          |
| B*44/N <sub>322-330</sub>    | MEVTPSGTW           |
| A*03/11/N <sub>361-369</sub> | KTFPTEPK            |
| A*03/N <sub>361-370</sub>    | KTFPTEPKK           |

**Supplemental Table 7: List of antibodies**

| Antigen       | Conjugate      | Clone     | Dilution | Isotype              | Catalogue number | Manufacturer   |
|---------------|----------------|-----------|----------|----------------------|------------------|----------------|
| CCR7          | PE/Dazzle594   | G043H7    | 1:50     | Mouse IgG2a, κ       | 353236           | BioLegend      |
| CCR7          | BV785          | G043H7    | 1:25     | Mouse IgG2a, κ       | 353230           | BioLegend      |
| CD8           | BV650          | RPA-T8    | 1:200    | Mouse IgG1, κ        | 301042           | BioLegend      |
| CD8           | BV510          | SK1       | 1:100    | Mouse BALB/c IgG1, κ | 563919           | BD Biosciences |
| CD8           | BV421          | RPA-T8    | 1:200    | Mouse IgG1, κ        | 562428           | BD Biosciences |
| CD8           | APC            | SK1       | 1:300    | Mouse BALB/c IgG1, κ | 345775           | BD Biosciences |
| CD28          | BV510          | CD28.2    | 1:33     | Mouse IgG1, κ        | 302936           | BioLegend      |
| CD127         | BV605          | A019D5    | 1:100    | Mouse IgG1, κ        | 351334           | BioLegend      |
| CD38          | APC-R700       | HIT2      | 1:400    | Mouse IgG1, κ        | 564979           | BD Biosciences |
| CD45RA        | BV785          | HI100     | 1:400    | Mouse IgG2b, κ       | 304139           | BioLegend      |
| CD45RA        | BUV496         | HI100     | 1:800    | Mouse IgG2b, κ       | 750258           | BD Biosciences |
| CD95          | PE             | DX2       | 1:16.67  | Mouse IgG1, κ        | 340480           | BD Biosciences |
| BCL-2         | BV421          | 100       | 1:200    | Mouse IgG1, κ        | 658709           | BioLegend      |
| TCF1          | AlexaFluor488  | C63D9     | 1:100    | Rabbit IgG           | 6444             | Cell Signaling |
| T-BET         | PE-Cy7         | 4B10      | 1:200    | Mouse IgG1, κ        | 25-5825          | eBioscience    |
| CD27          | erCP-eFluor710 | O323      | 1:100    | Mouse IgG1, κ        | 46-0279-42       | eBioscience    |
| CD27          | BV605          | L128      | 1:50     | Mouse BALB/c IgG1, κ | 562655           | BD Biosciences |
| CD4           | BUV395         | SK3       | 1:100    | Mouse IgG1, κ        | 563552           | BD Biosciences |
| CD4           | eFluor450      | RPA-T4    | 1:250    | Mouse IgG1, κ        | 48-0049          | eBioscience    |
| CCR6          | BUV737         | 11A9      | 1:25     | Mouse IgG1, κ        | 564377           | BD Biosciences |
| CXCR5         | BV421          | J252D4    | 1:100    | Mouse IgG1, κ        | 356920           | BioLegend      |
| Ox40          | BV510          | L106      | 1:200    | Mouse BALB/c IgG1, κ | 745040           | BD Biosciences |
| CD154 (CD40L) | PE             | TRAP1     | 1:20     | Mouse BALB/c IgG1, κ | 555700           | BD Biosciences |
| CXCR3         | APC            | G043H7    | 1:100    | Mouse IgG1, κ        | 353712           | BioLegend      |
| IFN-γ         | FITC           | 25723.11  | 1:8      | Mouse IgG2b          | 340449           | BD Biosciences |
| IL-2          | PerCP-Cy5.5    | MQ1-17H12 | 1:50     | Rat IgG2a, κ         | 500322           | BioLegend      |
| TNF           | PE-Cy7         | MAb11     | 1:50     | Mouse IgG1, κ        | 557647           | BD Biosciences |
| CD107a        | APC            | H4A3      | 1:100    | Mouse IgG1, κ        | 560664           | BD Biosciences |
| CD14          | APC-eFluor780  | 61D3      | 1:400    | Mouse IgG1, κ        | 47-0149-42       | eBioscience    |
| CD19          | APC-eFluor780  | HIB19     | 1:400    | Mouse IgG1, κ        | 47-0199-42       | eBioscience    |
| viability dye | eFluor780      |           | 1:400    |                      | 65-0865          | eBioscience    |
| viability dye | eFluor506      |           | 1:300    |                      | 65-0866          | eBioscience    |
